# Supplementary material for: Identification of QTNs Controlling Seed Protein Content in Soybean Using Multi-Locus Genome-Wide Association Studies
Source: Front Plant Sci. 2018 Nov 21;9:1690. doi: 10.3389/fpls.2018.01690 (PMC6258895; doi:10.3389/fpls.2018.01690)
Supplement: TABLE S5 — The information of pathways of 17 genes annotated in the KEGG database. [file Table_5.XLSX]

## Sheet: Sheet1
Table S5 The information of pathways of 17 genes annotated in the KEGG database
KEGG_A_class	KEGG_B_class	Pathway	Num（G)a	Num (G)b	Pathway ID	Genes	K_IDs
Metabolism	Global and overview maps	Metabolic pathways	4	4	ko01100	Glyma.01G020900;Glyma.12G112900;Glyma.03G100800;Glyma.18G027100	K00083+K00793+K00948+K05857
		Biosynthesis of secondary metabolites	3		ko01110	Glyma.01G020900;Glyma.12G112900;Glyma.03G100800	K00083+K00793+K00948
		Microbial metabolism in diverse environments	1		ko01120	Glyma.03G100800	K00948
		Biosynthesis of antibiotics	1		ko01130	Glyma.03G100800	K00948
		Carbon metabolism	1		ko01200	Glyma.03G100800	K00948
		Biosynthesis of amino acids	1		ko01230	Glyma.03G100800	K00948
	Carbohydrate metabolism	Pentose phosphate pathway	1	3	ko00030	Glyma.03G100800	K00948
		Fructose and mannose metabolism	1		ko00051	Glyma.12G113400	K19355
		Inositol phosphate metabolism	1		ko00562	Glyma.18G027100	K05857
	Nucleotide metabolism	Purine metabolism	1	1	ko00230	Glyma.03G100800	K00948
	Metabolism of cofactors and vitamins	Riboflavin metabolism	1	1	ko00740	Glyma.12G112900	K00793
	Biosynthesis of other secondary metabolites	Phenylpropanoid biosynthesis	1	1	ko00940	Glyma.01G020900	K00083
Genetic Information Processing	Transcription	Spliceosome	1	1	ko03040	Glyma.18G071300	K12880
	Translation	RNA transport	1	1	ko03013	Glyma.18G071300	K12880
	Folding, sorting and degradation	Protein export	1	3	ko03060	Glyma.18G071100	K12275
		Protein processing in endoplasmic reticulum	1		ko04141	Glyma.18G071100	K12275
		Proteasome	2		ko03050	Glyma.14G081600;Glyma.12G019300	K03030+K11599
Environmental Information Processing	Signal transduction	TGF-beta signaling pathway	1	2	ko04350	Glyma.12G018000	K04683
		Calcium signaling pathway	1		ko04020	Glyma.18G027100	K05857
		Phosphatidylinositol signaling system	1		ko04070	Glyma.18G027100	K05857
Cellular Processes	Transport and catabolism	Lysosome	1	1	ko04142	Glyma.10G207100	K01373
	Cell growth and death	Cell cycle	1	2	ko04110	Glyma.12G018000	K04683
		Apoptosis	1		ko04210	Glyma.10G207100	K01373
Organismal Systems	Endocrine system	Thyroid hormone signaling pathway	1	1	ko04919	Glyma.18G027100	K05857
Human Diseases	Endocrine and metabolic diseases	AGE-RAGE signaling pathway in diabetic complications	1	1	ko04933	Glyma.18G027100	K05857
	Infectious diseases: Viral	Epstein-Barr virus infection	1	1	ko05169	Glyma.14G081600	K03030
a indicates the number of genes in each pathway
b indicates the total number of genes in each KEGG_B_ class without repetition
